# Supplementary material for: Prioritizing the mHealth Design Space: A Mixed-Methods Analysis of Smokers’ Perspectives
Source: PubMed Central journal article supplement (PMC4992168; doi:10.2196/mhealth.5742), 2016-08-05
Supplement: mhealth_v4i3e95_app1.pdf [file mhealth_v4i3e95_app1.pdf]

**Appendix.** Adjusted p-values for paired comparisons (V) of importance ratings for design features by domain for all participants (A), younger participants (B), and older participants (C). Significant differences ( $P < .05$ ) are bolded.
